# Supplementary material
Source: PubMed Central journal article supplement (PMC6922066)
Supplement: Supp_FigureS2.pdf [file Supp_FigureS2.pdf]

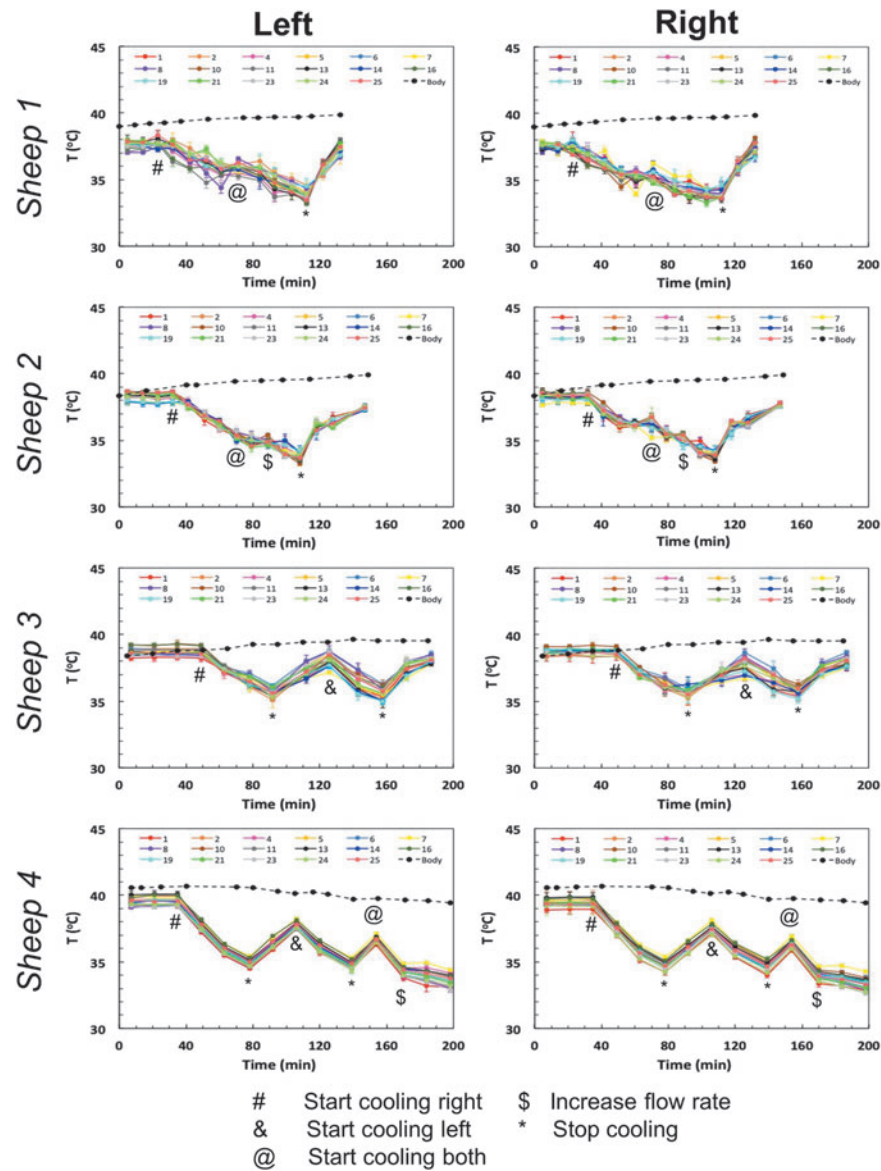

**SUPPLEMENTARY FIG. S2.** Experimental time courses for all four sheep. Each sheep had two intraventricular catheters implanted, one in each of the right and left lateral ventricles. After baseline temperature measurements, cooling was always started by circulating chilled saline through the right catheter (#). In some animals, cooling was switched to the left catheter (&), while in others cooling was stopped (\*) to allow the temperature to return to baseline. The circulation was then switched to the left catheter and the experiment repeated. In some animals, the flow was oriented so that it would go through both catheters (@). The flow rate was always initially set to 35 mL/min; however, in some animals, the flow was increased to 42 mL/min (\$) to determine whether greater reductions in temperature could be achieved.
