# Supplementary material
Source: PubMed Central journal article supplement (PMC6922066)
Supplement: Supp_FigureS3-S4.pdf [file Supp_FigureS3-S4.pdf]

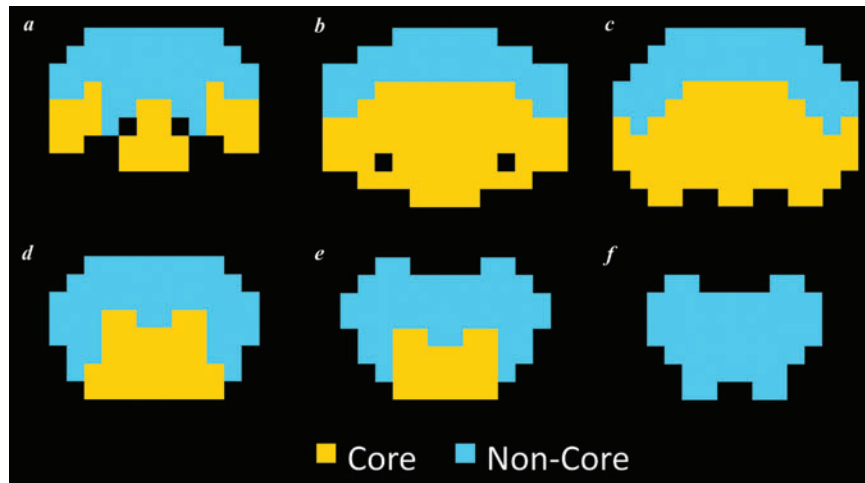

**SUPPLEMENTARY FIG. S3.** Identification of core and non-core regions of the brain. Anatomic regions were classified as either core or non-core based on their physical location in the brain. Of the 17 identified regions, six were identified as core regions (subcortex, midbrain, occipital lobe, olfactory tract, parahippocampal cortex, and temporal lobe).

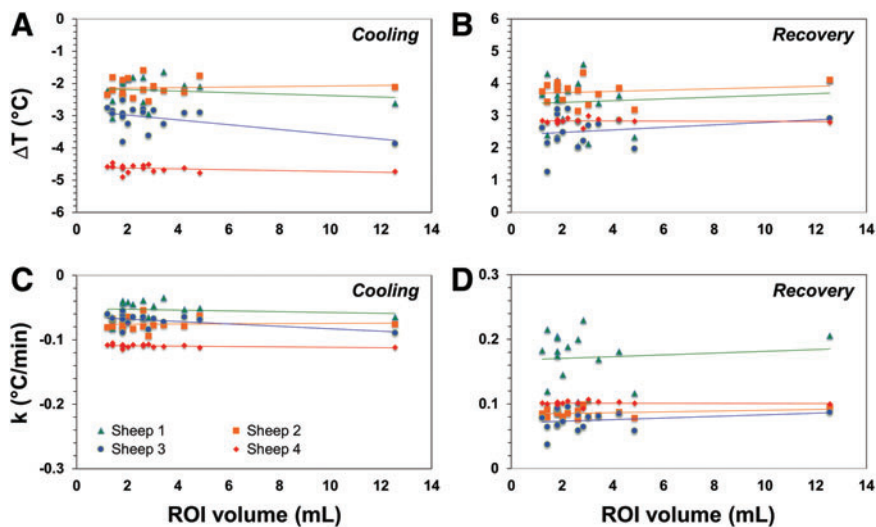

**SUPPLEMENTARY FIG. S4.** Effect of ROI volume on absolute change in temperature and rate of the temperature change. Although the anatomically-defined ROIs are of different sizes, the absolute change in temperature, as well as its rate of change, are independent of the size of the ROI.
