# Supplementary material
Source: PubMed Central journal article supplement (PMC6922066)
Supplement: Supp_TableS1.pdf [file Supp_TableS1.pdf]

SUPPLEMENTARY TABLE S1. COMPARISON OF PREVIOUSLY REPORTED<sup>17</sup> THERMOCOUPLE TEMPERATURE MEASUREMENTS  
TO BIOSENSOR IMAGING OF REDUNDANT DEVIATION IN SHIFTS TEMPERATURE MEASUREMENTS DURING COOLING  
USING THE INTRAVENTRICULAR CATHETER

|                 | <i>Thermocouple</i> |      |       |       |      | <i>BIRDS</i> |      |      |       |
|-----------------|---------------------|------|-------|-------|------|--------------|------|------|-------|
| Sheep #         | 1                   | 2    | 3     | 4     | 5    | 1            | 2    | 3    | 4     |
| Baseline T (°C) | 38.7                | 38.8 | 38.2  | 37.5  | 37.8 | 37.6         | 38.2 | 38.6 | 39.4  |
| Cooling T (°C)  | 33.4                | 37.3 | 33.8  | 31.8  | 36.0 | 35.7         | 36.2 | 35.7 | 34.7  |
| Delta T (°C)    | 5.4                 | 1.4  | 4.4   | 5.7   | 1.8  | 1.9          | 2.0  | 2.9  | 4.7   |
| % Change        | -13.9               | -3.6 | -11.4 | -15.1 | -4.7 | -5.1         | -5.2 | -7.5 | -11.9 |

BIRDS, Biosensor Imaging of Redundant Deviation in Shifts.

Brain temperatures reported by thermocouple are the average of four thermocouples inserted into anterior and posterior regions of both the right and left cortex. Brain temperatures reported by BIRDS are the average of all cortical (non-core) voxels. The baseline temperature is the brain temperature just before initiation of cooling. The cooling temperature is the brain temperature after cooling. These two values are then used to calculate the change in temperature ( $\Delta T$ ) and the percent change in temperature from baseline. Note that the temperatures reached after cooling using the thermocouples were after 3 h of continuous cooling, whereas the temperatures measured by BIRDS were after cooling in a single catheter for 30–40 min.
